# Supplementary material for: Deferiprone-Gallium-Protoporphyrin Chitogel Decreases Pseudomonas aeruginosa Biofilm Infection without Impairing Wound Healing
Source: MDPI journal article supplement (doi:10.3390/ma17040793), 2024-02-07
Supplement: s1 [file s1]

## Supplementary

**Table S1:** Primary antibodies

| Antibody                                   | Supplier                 | Working concentration |
|--------------------------------------------|--------------------------|-----------------------|
| Rat anti-NIMP-R14<br>#sc-59338             | Santa Cruz Biotechnology | 0.5µg/mL              |
| Mouse anti-PCNA<br>#sc-56                  | Santa Cruz Biotechnology | 1µg/mL                |
| Rat anti-F4/80<br>#MCA497R                 | Bio-Rad Laboratories     | 5µg/mL                |
| Rabbit anti-YM-1<br>#60130                 | Stem Cell Technologies   | 0.37µg/mL             |
| Mouse anti-Caspase-1<br>#sc-56036          | Santa Cruz Biotechnology | 1µg/mL                |
| Mouse anti-Annexin-V<br>#sc-74438          | Santa Cruz Biotechnology | 1µg/mL                |
| Rabbit anti-Collogen 1<br>#600-401-103-0.5 | Rockland                 | 5µg/mL                |
| Rabbit anti-Collogen 3<br>#600-401-105-0.5 | Rockland                 | 5µg/mL                |

**Table S2:** Secondary antibodies

| Antibody                                    | Supplier   | Working concentration |
|---------------------------------------------|------------|-----------------------|
| Alexa Flour goat anti-rat 488<br>#A11006    | Invitrogen | 5µg/mL                |
| Alexa Flour goat anti-mouse 568<br>#A11004  | Invitrogen | 5µg/mL                |
| Alexa Flour goat anti-rabbit 568<br>#A11011 | Invitrogen | 5µg/mL                |
| Alexa Flour goat anti-rabbit 488<br>#A27034 | Invitrogen | 5µg/mL                |

**Table S3.** Minimum inhibitory concentration of liquid Def and GaPP treatment on *P. aeruginosa*. n=3.

|                      | Def<br>(mM) | GaPP<br>(µg/ml) | Def-GaPP<br>(mM - µg/ml) |
|----------------------|-------------|-----------------|--------------------------|
| <i>P. aeruginosa</i> | 10          | 500             | 2.5 - 125                |

**Table S4.** Zone of inhibition of *P. aeruginosa* treated with Def and GaPP Chitogels bacteria were grown on tryptic soy agar plates incubated overnight and with either Chitogel, Def 10mM, GaPP 500µg/mL or Def-GaPP 10mM-500µg/mL treatment. Results displayed as Mean (mm) \*\*\* p<0.001 compared to Chitogel; ^^^p<0.001 compared to Def-GaPP. n=6.

|                      | Chitogel<br>(mm) | Def<br>(mm)      | GaPP<br>(mm) | Def-GaPP<br>(mm) |
|----------------------|------------------|------------------|--------------|------------------|
| <i>P. aeruginosa</i> | 0.0 ± 0.0        | 10.8 ± 0.1***^^^ | 0.0 ± 0.0^^^ | 20.3 ± 0.1***    |
